Anesthesiology  
83:816-822, 1995  
© 1995 American Society of Anesthesiologists, Inc.  
Lippincott-Raven Publishers

## Role of Pertussis Toxin-sensitive G-Proteins in the Analgesic and Anesthetic Actions of $\alpha_2$ -Adrenergic Agonists in the Rat

Yukio Hayashi, M.D.,\* Bradford C. Rabin, B.S.,† Tian-Zhi Guo, M.D.,‡ Mervyn Maze, M.B., Ch.B.§

**Background:**  $\alpha_2$  Adrenoceptors are coupled to G-proteins sensitive to pertussis toxin (PTX) in the locus coeruleus. At this site, the hypnotic response to dexmedetomidine, an  $\alpha_2$  agonist, can be blocked by pretreatment with PTX. G-proteins sensitive to PTX may also be involved in the transduction of anesthetic and analgesic responses to  $\alpha_2$  agonists at supraspinal or spinal sites. To address this question the effects of pretreatment with PTX administered intracerebroventricularly, intrathecally, or a combination of the two were examined on the MAC for halothane, and the anesthetic-sparing and analgesic effects of a systemically administered  $\alpha_2$  agonist, dexmedetomidine.

**Methods:** Rats were cannulated intracerebroventricularly, intrathecally, and with a combination of intracerebroventricular/intrathecal and treated with PTX (0 and 2.5  $\mu$ g intracerebroventricularly; 0 or 0.5  $\mu$ g intrathecally; 0 + 0 or 2.5 + 0.5 intracerebroventricular-intrathecal). After 7 days, either the analgesic (tail-flick latency) or the MAC-sparing effects of a calculated 50% effective dose of dexmedetomidine were measured. To confirm that intracerebroventricularly administered PTX was effective, ribosylation of G-proteins was assessed in periventricular brain tissue.

**Results:** The analgesic action of dexmedetomidine was blocked by PTX intrathecally but not by PTX via the intracerebroventricular route. The MAC-sparing action of dexmedetomidine was not blocked by PTX via the intrathecal or in-

tracerebroventricular routes alone or in combination. Yet, intracerebroventricularly administered PTX effectively ribosylated the G-proteins.

**Conclusions:** Taken together with the authors' previous report, these data suggest that the hypnotic and the analgesic responses to dexmedetomidine are transduced via PTX-sensitive G-protein-coupled  $\alpha_2$  adrenoceptors but at separate sites (analgesic—spinal; hypnotic—locus coeruleus). Further studies are needed to localize the precise site(s) for the MAC-sparing effect of dexmedetomidine and to establish whether PTX-sensitive G-proteins are involved in this response. (Key words: Receptors, G-proteins: halothane; pertussis toxin. Sympathetic nervous system,  $\alpha_2$ -adrenergic agonists: dexmedetomidine.)

GUANINE nucleotide binding proteins (G-protein) are pivotally involved in the signal transduction of all adrenergic responses.<sup>1</sup> Bacterial toxins from *Vibrio cholera* or *Bordetella pertussis* can covalently modify the G-proteins by the addition of an adenosine diphosphate-ribose group to the  $\alpha$  subunit of the heterotrimeric protein. Thus,  $\alpha$  subunits, and hence the G-proteins, can be classified into four groups according to their sensitivity to ribosylation by one, both, or neither toxin.<sup>2</sup>

The pertussis toxin (PTX)-sensitive G-proteins, which represent 1–2% of the total membrane protein in mammalian brain,<sup>3</sup> couple many inhibitory neurotransmitter receptors to their effectors.<sup>4,5</sup> PTX-sensitive G-proteins are known to be involved in the signal transduction of several  $\alpha_2$  adrenoceptor systems.<sup>6,7</sup> Earlier, we reported that the hypnotic response to dexmedetomidine, a highly-selective  $\alpha_2$  agonist, is blocked when PTX is administered intracerebroventricularly.<sup>8</sup> Subsequently, we demonstrated that PTX ribosylates G-proteins in the locus coeruleus to effect this blocking action.<sup>9</sup>

Apart from their hypnotic action,  $\alpha_2$  agonists have been advocated for use in the clinical practice of anesthesia because of their potent analgesic and anesthetic-sparing actions.<sup>10</sup> Although both supraspinal and spinal mechanisms may be involved in the analgesic re-

\* Postdoctoral Research Fellow. Current position: Department of Anesthesiology, National Cardiovascular Center, Osaka, Japan.

† Medical Student.

‡ Research Associate.

§ Professor in Anesthesia.

Received from the Department of Anesthesia, Stanford University, and Anesthesiology Service, VA Medical Center, Palo Alto, California. Submitted for publication December 29, 1994. Accepted for publication June 4, 1995. Supported in part by the Department of Veterans Affairs (Merit Award to Dr. Maze) and the Uehara Foundation (to Dr. Hayashi). Presented in part at the annual meeting of the American Society of Anesthesiologists, Washington, D.C., October 9–13, 1993.

Address reprint requests to Dr. Maze: Anesthesia Service (112A), VA Medical Center, 3801 Miranda Avenue, Palo Alto, California 94304. Address electronic mail to: Maze@Leland.Stanford.Edu.

response,<sup>11</sup> the dependence of  $\alpha_2$  agonists on PTX-sensitive G-proteins has been extensively tested. Likewise, the (MAC-reducing) action, neither the role of PTX-sensitive G-proteins has been defined.

While the molecular mechanism of action remains obscure, there is evidence for the participation of G-protein in its action (for review, see 13). PTX-sensitive G-proteins are a possible target site for anesthetic agents because halothane and the function of PTX-sensitive G-proteins.

In the present study we examined the dependence on, PTX-sensitive G-proteins of the anesthetic-sparing and analgesic actions of systemically administered dexmedetomidine to determine whether functionally sensitive G-proteins in the periventricular brain, could affect the anesthetic-sparing action of dexmedetomidine in rats.

### Methods

#### Animal Preparation

Male Sprague-Dawley rats (250–300 g) were used in the study after approval by the protocol by the Animal Care Committee of the Palo Alto Veterans Affairs Medical Center. The rats were stratified into control and treatment groups to match weight distribution. Halothane-anesthetized rats were cannulated in the left lateral ventricle (intracerebroventricularly) and intrathecally (intrathecal cannulation, an 18-gauge polyethylene tube) was passed under the dura mater overlying the level of the lumbar vertebrae to four days after intracerebroventricular and intrathecal cannulation. A 30-G stainless steel needle was inserted through the tubing, was inserted through the dura mater 1 mm beyond its tip. Five to seven days were allowed for recovery from the cannulation. The rats received either PTX (2.5  $\mu$ g intracerebroventricularly; or 2.5  $\mu$ g intrathecal; or 2.5  $\mu$ g intracerebroventricular-intrathecal) or 10  $\mu$ g intracerebroventricularly.

G-PROTEINS IN  $\alpha_2$  ANESTHESIA AND ANALGESIA

sponse,<sup>11</sup> the dependence of the analgesic effect of  $\alpha_2$  agonists on PTX-sensitive G-proteins has not been rigorously tested. Likewise, for the anesthetic-sparing (MAC-reducing) action, neither the precise site(s) nor the role of PTX-sensitive G-proteins at these sites have been defined.

While the molecular mechanism of volatile anesthetic action remains obscure, there appears to be compelling evidence for the participation of a membrane-bound protein in its action (for reviews see references 12 and 13). PTX-sensitive G-proteins have also been suggested as a possible target site for the anesthetic action of volatile agents because halothane has been shown to alter the function of PTX-sensitive G-proteins.<sup>14-16</sup>

In the present study we examined the sites for, and the dependence on, PTX-sensitive G-proteins in the anesthetic-sparing and analgesic actions of systemically administered dexmedetomidine. Also, we sought to determine whether functional inactivation of PTX-sensitive G-proteins in the periventricular regions of the rat brain, could affect the anesthetic sensitivity to halothane in rats.

## Methods

### Animal Preparation

Male Sprague-Dawley rats weighing 250–300 g were used in the study after approval of the experimental protocol by the Animal Care and Use Committee at the Palo Alto Veterans Affairs Medical Center. Rat littermates were stratified into control and treatment groups to match weight distribution as closely as possible. Halothane-anesthetized rats were cannulated either in the left lateral ventricle (intracerebroventricularly), intrathecally, or by a combination of intracerebroventricular and intrathecal as previously described.<sup>17,18</sup> For intrathecal cannulation, an intrathecal catheter (PE-10 polyethylene tube) was passed through an incision in the dura mater overlying the cisterna magna and inserted to the level of the lumbar enlargement.<sup>18</sup> Two to four days after intracerebroventricular cannulation, a 30-G stainless steel needle, connected to polyethylene tubing, was inserted through the cannula and positioned 1 mm beyond its tip. After intrathecal surgery, 5–7 days were allowed for the animals to recover. Rats received either PTX (2.5  $\mu$ g intracerebroventricular; 0.5  $\mu$ g intrathecal; or 2.5 + 0.5  $\mu$ g intracerebroventricular-intrathecal) or 10 (intracerebroventricular) to

12.5 (intrathecal)  $\mu$ l of the solvent vehicle (sodium phosphate buffer  $6.7 \times 10^{-2}$ M, pH 7.4). PTX or vehicle administration was facilitated by a microsyringe pump (CMA/100 Microinjection pump; Bioanalytic Systems Inc., West Lafayette, IN) over 2 min to minimize tissue disruption. For the intrathecal administration, an additional 12.5  $\mu$ l of saline flush was needed to clear the dead space of the intrathecal catheter. Rats were used for the behavioral or biochemical experiments on day 7 after the PTX or vehicle injection as reported earlier.<sup>9</sup> Animals that failed to thrive after PTX administration were not tested further.

### Behavioral Testing

Sensitivity to halothane was determined by measuring the MAC, which prevents a response to a supramaximal stimulus as previously described by us.<sup>19</sup> Briefly, halothane was vaporized in oxygen at a flow of  $5 \text{ l} \cdot \text{min}^{-1}$  and introduced into a methyl methacrylate polymer exposure chamber. Anesthetic concentration was monitored continuously by an infrared spectral analyzer (Datex 222, Puritan, Bennett) that was calibrated by mass spectroscopy before every experiment. A battery-operated fan was used to distribute the gas evenly throughout the chamber. Rectal temperature was continuously monitored and maintained at  $37.5 \pm 1.0^\circ\text{C}$  with heating blankets. The response of animals to a supramaximal noxious stimulus was assessed by applying a 6" hemostat to the first ratchet position on the middle portion of the tail for 1 min. If the rat made a purposeful movement to the tail clamp, a positive response was recorded. The first stimulus was applied at a concentration of 0.8%, which previous studies showed would invariably result in a positive response. The halothane concentration was increased by 0.1% increments, and the next stimulation was done after allowing 30 min for equilibration. This process was repeated until no animal exhibited a positive response to tail clamping. This process allowed one to derive the particular animal's MAC, *i.e.*, the interpolated value between halothane concentrations that provided a positive and negative response. Each cohort consisted of a minimum of 12 rats. To examine the effect of pretreatment of PTX on the anesthetic-sparing effect of dexmedetomidine, rats were administered  $30 \mu\text{g} \cdot \text{kg}^{-1}$  intraperitoneal dexmedetomidine (the  $\approx$ calculated 50% effective dose for MAC-reduction)<sup>19</sup> and the halothane MAC was assessed again 30 min later.



Analgesic response was measured by the tail-flick latency response as previously described.<sup>20</sup> A high-intensity light was focused on the rat's tail and the time that it took for the rat to move its tail out of the light beam was automatically recorded (Tail-flick apparatus, Columbus Instruments, Columbus, OH) and referred as tail-flick latency. A different patch of the tail was exposed to the beam on each trial to minimize the risk of tissue damage. The animals were placed on the heating blanket to maintain body and tail temperature during the experiment. A cutoff time of 10 sec was defined at which time the trial was terminated if no response occurred. Data are expressed as maximum percent effect according to the following formula:

$$\text{MPE}(\%) = \frac{\text{Postdrug latency} - \text{basal latency}}{\text{Cutoff latency} - \text{basal latency}} \times 100.$$

Dexmedetomidine was used in the analgesic paradigm at a dose of  $50 \mu\text{g} \cdot \text{kg}^{-1}$  (an  $\approx 50\%$  maximum percent effect dose) intraperitoneally, and the tail-flick test was performed 40 min after treatment with dexmedetomidine; dose and time of testing were established by pilot experiments.

#### Adenosine Diphosphate Ribosylation

Halothane-anesthetized rats were killed on day 7 after receiving  $2.5 \mu\text{g}$  PTX intracerebroventricularly. Brains were harvested and immediately frozen on dry ice and stored at  $-70^\circ\text{C}$ . Twenty-four hours later, a 0.5 mm strip of periventricular tissue was dissected in the following manner. The brain was placed in an ice-cold brain matrix mold to cut 2-mm coronal slices. The slice(s) containing the lateral ventricle and the cannula track was isolated and placed on an ice-cold glass plate. Using a 0.5-mm bore glass pipette, punches were taken alongside the ventricle. This tissue was prepared for *in vitro* ribosylation as previously described.<sup>9</sup> After polyacrylamide gel electrophoresis and autoradiography, the G-protein bands were analyzed with a densitometer (Pharmacia-LKB, Ultrosan XL Enhanced Laser Densitometer).

#### Statistical Analysis

Data are expressed as mean  $\pm$  SEM. The results of multiple groups were analyzed by repeated-measures analysis of variance followed by *post hoc* Scheffe's test. The comparison between two groups was performed by *t* test for unpaired data. A *P* value less than 0.05 was considered statistically significant.

## Results

Neither intracerebroventricular nor intrathecal pretreatment of PTX changed the basal latency in the analgesia-testing paradigm (fig. 1A). While the analgesic effect of systemically administered dexmedetomidine,  $50 \mu\text{g} \cdot \text{kg}^{-1}$  intraperitoneally, was not affected by intracerebroventricular PTX treatment, it was attenuated by intrathecal PTX (fig. 1B). Neither intracerebro-

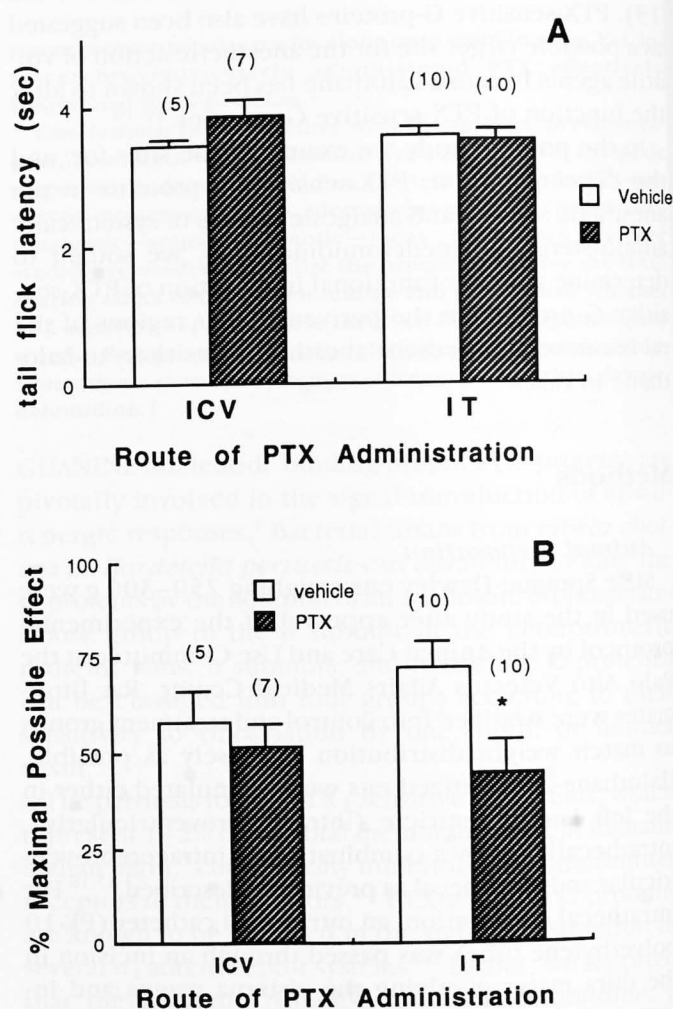

Fig. 1. Effect of intracerebroventricular and intrathecal pertussis toxin on the tail-flick latency response (A) and analgesic effect of dexmedetomidine (B). Rats were pretreated with pertussis toxin ( $2.5 \mu\text{g}$  intracerebroventricularly or  $0.5 \mu\text{g}$  intrathecal) or vehicle administered either intracerebroventricularly or intrathecal and 7 days later the tail-flick latency was measured before (A) or after intraperitoneal dexmedetomidine  $50 \mu\text{g} \cdot \text{kg}^{-1}$  (B) by tail-flick test. Data are expressed as the absolute latency (A) or the percent of maximal possible analgesic effect (B) mean  $\pm$  SEM; the number of rats per group is shown in parentheses. \**P* < 0.05 compared to vehicle.

intracerebroventricular, intrathecal, nor intraperitoneal altered either the basal latency or the analgesic effect of systemically administered dexmedetomidine,  $30 \mu\text{g} \cdot \text{kg}^{-1}$ . The intensities of  $^{32}\text{P}$ -ADP-ribosylation in PTX-treated groups are shown in figure 3. The reduction in the incorporation of  $^{32}\text{P}$ -ADP-ribose into G-proteins was sensitive to G-proteins.

## Discussion

The analgesic action of dexmedetomidine was blocked by PTX intracerebroventricularly or intrathecaly. The analgesic effect of dexmedetomidine was not affected by intracerebroventricular or intrathecal PTX in combination. Yet, intracerebroventricular PTX effectively blocked the analgesic effect of dexmedetomidine.

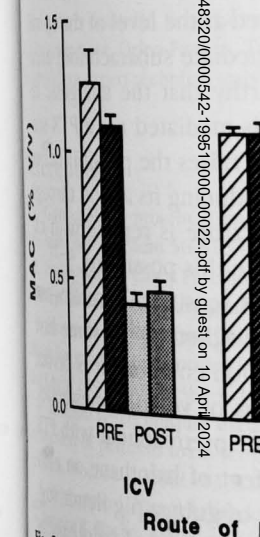

Fig. 2. Effects of pertussis toxin on the analgesic effect of dexmedetomidine. Rats were pretreated with pertussis toxin ( $2.5 \mu\text{g}$  intracerebroventricularly or  $0.5 \mu\text{g}$  intrathecal) or vehicle administered either intracerebroventricularly or intrathecal and 7 days later the tail-flick latency was measured before (A) or after intraperitoneal dexmedetomidine  $50 \mu\text{g} \cdot \text{kg}^{-1}$  (B) by tail-flick test. Data are expressed as the absolute latency (A) or the percent of maximal possible analgesic effect (B) mean  $\pm$  SEM; the number of rats per group is shown in parentheses. \**P* < 0.05 compared to vehicle.

G-PROTEINS IN  $\alpha_2$  ANESTHESIA AND ANALGESIA

tricular, intrathecal, nor intracerebroventricular-intrathecal altered either the basal MAC for halothane or the MAC-reducing effect of systemically administered dexmedetomidine,  $30 \mu\text{g} \cdot \text{kg}^{-1}$  (fig. 2). Because of the lack of effect with intracerebroventricular-PTX we determined whether this treatment effectively ribosylated G-proteins. The intensities of the bands detected by  $^{32}\text{P}$ -NAD ribosylation in PTX-treated and vehicle-treated groups are shown in figure 3. *In vivo* administration of PTX decreased *in vitro* ribosylation as reflected by the reduction in the incorporation of radiolabeled adenosine diphosphate-ribose in the  $\alpha$  subunits of PTX-sensitive G-proteins.

## Discussion

The analgesic action of dexmedetomidine was blocked by PTX intrathecally but not by PTX *via* the intracerebroventricular route. The MAC-sparing action of dexmedetomidine was not blocked by PTX *via* the intrathecal or intracerebroventricular routes alone or in combination. Yet, intracerebroventricularly administered PTX effectively ribosylated the G-proteins.

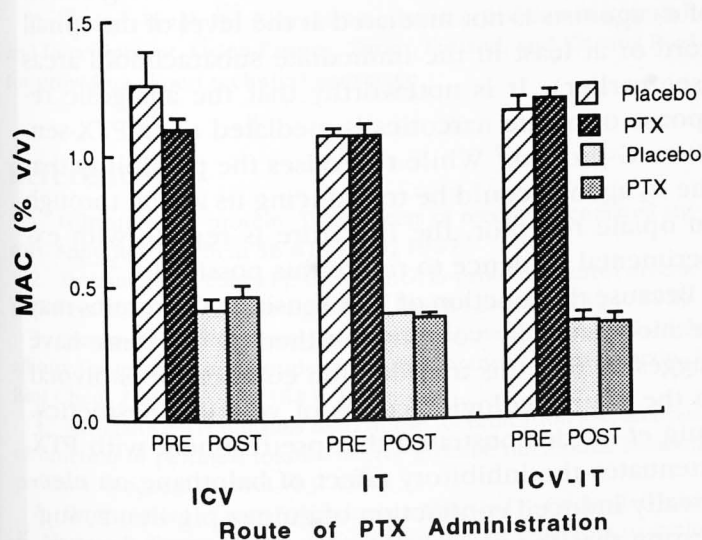

Fig. 2. Effects of pertussis toxin administered intracerebroventricularly, intrathecally, and a combination of both methods of administration on anesthetic-sparing action of dexmedetomidine. Rats were pretreated with pertussis toxin ( $2.5 \mu\text{g}$  intracerebroventricular;  $0.5 \mu\text{g}$  intrathecal;  $2.5$  and  $0.5 \mu\text{g}$  intracerebroventricular/intrathecal combination) or vehicle intracerebroventricularly, intrathecally, or by a combination of intracerebroventricular and intrathecal routes. Seven days later the MAC for halothane was measured before (pre) and after (post)  $30 \mu\text{g} \cdot \text{kg}^{-1}$  intraperitoneal dexmedetomidine. Data are expressed as mean  $\pm$  SEM;  $n = 12-27$ .

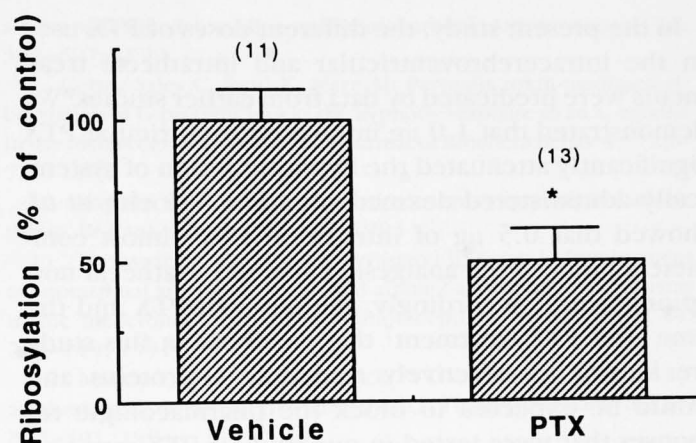

Fig. 3. Effect of *in vivo* pertussis toxin on *in vitro* adenosine diphosphate-ribosylation of G-proteins. Rats were treated with  $2.5 \mu\text{g}$  pertussis toxin or vehicle intracerebroventricularly. On day 8 animals were killed and adenosine diphosphate-ribosylation was assessed by autoradiography and laser densitometry as previously described.<sup>8</sup> Data are normalized by expressing the densitometry as a percent of the relevant vehicle value. Data are expressed as mean  $\pm$  SEM; the number of samples is shown in parentheses. \* $P < 0.05$  compared to vehicle.

The  $\alpha_2$ -adrenergic agonists represent a novel class of hypnotic-anesthetic agents because of their selectivity for specific membrane receptors. Cell surface receptors use a variety of membrane signaling mechanisms to transduce the message, carried by the agonist, into cellular responses. Collectively, these mechanisms are referred to as transmembrane signaling or signal transduction. For the  $\alpha_2$ -adrenergic responses, the transmembrane signaling system involves the coupling of the receptor protein, *via* a guanine nucleotide binding protein to an effector mechanism. PTX contains a ribosylase that catalyzes the attachment of adenosine diphosphate-ribose to a conserved cysteine residue four amino acids from the carboxy terminus of the  $\alpha$  subunit of PTX-sensitive G-proteins.<sup>21</sup> Once the G-protein is ribosylated by PTX, it fails to dissociate after the activation of the receptors by its agonists, resulting in the uncoupling of the  $\alpha_2$  adrenoceptor from its effector mechanism. Thus, pharmacologic responses to  $\alpha_2$  agonists are attenuated. In previous studies in which we ribosylated G-proteins with PTX and measured the behavioral response *in vivo*, we reported on the involvement of a PTX-sensitive G-protein in the transduction of the hypnotic response to dexmedetomidine.<sup>8,9</sup> Now we have established that the spinal analgesic response to dexmedetomidine is also transduced *via* a PTX-sensitive G-protein.



In the present study, the different doses of PTX used in the intracerebroventricular and intrathecal treatments were predicated by data from earlier studies. We demonstrated that 1.0  $\mu$ g intracerebroventricular PTX significantly attenuated the hypnotic action of systemically administered dexmedetomidine.<sup>8</sup> Hoehn *et al.* showed that 0.5  $\mu$ g of intrathecal PTX almost completely blocked the analgesic effect of intrathecal norepinephrine.<sup>7</sup> Accordingly, the doses of PTX and the time after PTX treatment<sup>7</sup> that we chose in this study are known to effectively ribosylate G-proteins and would be expected to block the pharmacologic responses that were tested in our study if PTX-sensitive G-proteins were pivotally involved at these different sites.

PTX pretreatment did not affect the MAC-reducing effect of dexmedetomidine (fig. 2), although intrathecal PTX attenuated the analgesic response (fig. 1B) and previously we have shown that intracerebroventricular PTX attenuated the hypnotic response.<sup>8</sup> Using a series of antagonists, we previously demonstrated that dexmedetomidine exerts its MAC-reducing effect by activating an  $\alpha_2$  adrenoceptor.<sup>19</sup> Until recently, all biologic responses that are mediated by  $\alpha_2$  adrenoceptors were thought to couple invariably to PTX-sensitive G-proteins; however, this tenet has been challenged by the finding that a PTX-insensitive G-protein participates in the signal transduction of an  $\alpha_2$  response in a recombinant system.<sup>22</sup> This precedent raises the possibility that the MAC-sparing effect of dexmedetomidine is transduced by a PTX-insensitive G-protein.

To further elucidate PTX's inability to reverse the MAC-sparing effect of dexmedetomidine, we demonstrated the *in vivo* ribosylation of G-proteins by PTX. While these studies clearly established the functional integrity of this toxin within our paradigm, they also revealed that more than 50% of the  $\alpha$  subunits were *not* ribosylated by the *in vivo* treatment with PTX. The hypnotic response was recently shown to be relatively inefficient requiring the activation of more than 80% of membrane receptors while the analgesic response requires only 50% of  $\alpha_2$  adrenoceptors to be available.<sup>20</sup> Thus, a 50% reduction in ribosylation is enough to attenuate both the hypnotic,<sup>8</sup> and presumably the analgesic responses to dexmedetomidine. It is notable that animals rendered tolerant to the hypnotic and analgesic actions of dexmedetomidine are still capable of exhibiting this drug's MAC-sparing action (unpublished observations). Thus, it appears that the MAC-sparing ac-

tion of  $\alpha_2$  agonists is very efficiently transduced and this response will only be blocked when considerably more than 50% of the PTX-sensitive G-proteins are inactivated. Therefore, in our study there may still be a sufficient reserve of functional G-proteins to permit the MAC-reducing effect of dexmedetomidine were this molecular component to be needed for its transmembrane signaling.

A second explanation for the inability of PTX to attenuate the MAC-sparing effect may be related to the finding that PTX penetrates tissues very poorly<sup>23</sup>; therefore, it is possible that the site for the MAC-sparing action of  $\alpha_2$  agonists is still dependent on PTX-sensitive G-proteins, which reside beyond a 1 mm radius from the ventricular system.

Similar molecular mechanisms in the spinal cord mediate the analgesic action of both opiate narcotics and the  $\alpha_2$  agonists. Because it was reported that morphine can exert its MAC-reducing effect at the level of the spinal cord<sup>24</sup> we expected that  $\alpha_2$  agonists would act in a similar fashion. While intrathecally administered PTX blocks the analgesic effect of dexmedetomidine it had no effect on its anesthetic-sparing property. This suggests that either a PTX-insensitive G-protein is involved (see earlier) or that the MAC-reducing action of  $\alpha_2$  agonists is not mediated at the level of the spinal cord or at least in the immediate subarachnoid areas (see earlier). It is noteworthy that the analgesic response of opiate narcotics is mediated *via* a PTX-sensitive G-protein.<sup>7</sup> While this raises the possibility that the  $\alpha_2$  agonist could be transducing its action through an opiate receptor, the literature is replete with experimental evidence to refute this possibility.<sup>25-27</sup>

Because the function of PTX-sensitive G-proteins may be modulated by volatile anesthetics,<sup>15,16</sup> some have suggested that this transduction component is pivotal to the pharmacologic actions of volatile anesthetics. Puig *et al.* demonstrated that pretreatment with PTX attenuates the inhibitory effect of halothane on electrically induced contraction of guinea pig ileum, suggesting that the pharmacologic effect of halothane is mediated by PTX-sensitive G-protein.<sup>28,29</sup> Conversely, myocardial depression exerted by volatile anesthetics was not affected by pretreatment with PTX, although the same treatment could abolish the effect of muscarinic agonists acting *via* its G-protein-coupled receptors.<sup>30</sup> Furthermore, PTX did not alter halothane's ability to relax airway smooth muscle.<sup>31</sup> Thus, the involvement of PTX-sensitive G-protein in the action of volatile

anesthetics is not universal. Individual pharmacologic results do not implicate G-proteins in the molecular effect of the volatile agent. A change in MAC after spinal anesthesia recently suggested that the anesthetic inhibition of maximal noxious stimulus through intrathecal and intracerebroventricular administration of PTX may have a role for PTX-sensitive G-proteins in the anesthetic inhibition of the supramaximal noxious stimulus. In summary, PTX-sensitive G-proteins in the spinal cord mediate the signal transduction for the effects of systemically administered  $\alpha_2$  agonists, respectively. Further studies are needed to clarify the involvement of G-proteins for the MAC-reducing effect of dexmedetomidine.

The authors thank Dr. R. L. L. and Development, Orion-Pharm, for providing expert technical assistance.

## References

1. Gilman AG: G-proteins: Transducers of neurotransmitter signals. *Annu Rev Biochem* 58:615-649, 1989
2. Freissmuth M, Casey PJ, Gilman AG: G-proteins: Signaling pathways of transmembrane receptors. *Cell* 61:289-298, 1990
3. Sternweis PC, Robishaw JD: G-proteins: A family for guanine nucleotide binding. *Biochem J* 259:13806-13813, 1990
4. Milligan G: Techniques used to study the function of pertussis toxin-sensitive G-proteins. *Biochem J* 255:1-13, 1989
5. Birnbaumer L, Yatani A, Vandenbergh R, Brown AM: G-proteins: Channels and other effector systems. *Cell* 58:225-235, 1989
6. Aghajanian GK, Wang Y-Y: Current evoked by opiate and alcohol in neurons. *Brain Res* 71:390-394, 1983
7. Hoehn K, Reid A, Sawynok J: Analgesia produced by intrathecal injection of bupivacaine and baclofen. *Eur J Pharmacol* 141:1-10, 1988
8. Doze VA, Chen B-X, Tinklenberg H: 4-aminopyridine differentially affects the actions of

G-PROTEINS IN  $\alpha_2$  ANESTHESIA AND ANALGESIA

anesthetics is not universal and may depend on the individual pharmacologic response tested. The present results do not implicate periventricular PTX-sensitive G-proteins in the molecular mechanism for the anesthetic effect of the volatile agents. Based on the absence of a change in MAC after spinal cord transection, it was recently suggested that the spinal cord may be the site for anesthetic inhibition of the response to the supramaximal noxious stimulus that is used in MAC studies.<sup>32</sup> However, neither intrathecal nor the combination of intrathecal and intracerebroventricular PTX altered the MAC for halothane. These data do not support a mediating role for PTX-sensitive G-proteins in the spinal cord for the anesthetic inhibition of the motor response to the supramaximal noxious stimulus that is used in MAC testing.

In summary, PTX-sensitive G-proteins in the locus coeruleus and the spinal cord appear to be involved in the signal transduction for the hypnotic and analgesic effects of systemically administered dexmedetomidine, respectively. Further studies are needed to localize the site(s) and to clarify the involvement of PTX-sensitive G-proteins for the MAC-reducing effect of dexmedetomidine.

The authors thank Dr. Risto Lamminstausta, Division of Research and Development, Orion-Farmos, Turku, Finland, and Kristina Reid for providing expert technical assistance.

## References

1. Gilman AG: G-protein: Transducers of receptor-generated signals. *Annu Rev Biochem* 56:615-649, 1987
2. Freissmuth M, Casey PJ, Gilman AG: G-proteins control diverse pathways of transmembrane signaling. *FASEB J* 3:2125-2131, 1989
3. Sternweis PC, Robishaw JD: Isolation of two proteins with high affinity for guanine nucleotides from membranes of bovine brain. *J Biol Chem* 259:13806-13813, 1984
4. Milligan G: Techniques used in the identification and analysis of function of pertussis toxin-sensitive guanine nucleotide binding proteins. *Biochem J* 255:1-13, 1988
5. Birnbaumer L, Yatani A, Vandongen AMJ, Graf R, Codina J, Okabe K, Mattera R, Brown AM: G-protein coupling of receptors to ionic channels and other effector systems. *Br J Clin Pharmacol* 30:13S-22S, 1990
6. Aghajanian GK, Wang Y-Y: Pertussis toxin blocks the outer current evoked by opiate and  $\alpha_2$ -agonists in locus coeruleus neurons. *Brain Res* 71:390-394, 1986
7. Hoehn K, Reid A, Sawynok J: pertussis toxin inhibits antinociception produced by intrathecal injection of morphine, noradrenaline and baclofen. *Eur J Pharmacol* 146:65-72, 1988
8. Doze VA, Chen B-X, Tinklenberg JA, Segal IS, Maze M: Pertussis toxin and 4-aminopyridine differentially affect the hypnotic-anesthetic action of dexmedetomidine and pentobarbital. *ANESTHESIOLOGY* 73:304-307, 1990
9. Correa-Sales C, Reid K, Maze M: Pertussis toxin-mediated ribosylation of G-proteins blocks the hypnotic response to an  $\alpha_2$ -agonist in the locus coeruleus of the rat. *Pharmacol Biochem Behav* 43:723-727, 1992
10. Hayashi Y, Maze M: Alpha2 adrenoceptor agonists and anaesthesia. *Br J Anaesth* 71:108-118, 1993
11. Pertovaara A, Kauppila T, Jyvasjarvi E, Kalso E: Involvement of supraspinal and spinal segmental alpha-2-adrenergic mechanisms in the medetomidine-induced antinociception. *Neuroscience* 44:705-714, 1991
12. Moody EJ, Harris BF, Skolnick P: The potential for safer anaesthesia and stereoselective anaesthetics. *Trends Pharmacol Sci* 15:387-391, 1994
13. Franks NP, Lieb WR: Molecular and cellular mechanisms of general anesthesia. *Nature* 367:607-614, 1994
14. Yost CS: G-proteins: Basic characteristics and clinical potential for the practice of anesthesia. *Anesth Analg* 77:822-834, 1993
15. Dennison RL Jr, Anthony BL, Narayanan TK, Aronstam RS: Effects of halothane on high affinity agonist binding and guanine nucleotide sensitivity of muscarinic acetylcholine receptors from brainstem of rat. *Neuropharmacology* 26:1201-1205, 1987
16. Baumgartner MK, Dennison RL, Narayanan TK, Aronstam RS: Halothane disruption of  $\alpha_2$ -adrenergic receptor-mediated inhibition of adenylate cyclase and receptor G-protein coupling in rat brain. *Biochem Pharmacol* 39:223-225, 1990
17. Schwinn SA, Correa-Sales C, Page SO, Maze M: Functional effects of activation of  $\alpha_1$ -adrenergic receptors by dexmedetomidine: In vivo and in vitro studies. *J Pharmacol Exp Ther* 259:1147-1152, 1991
18. Yaksh TL, Stevens CW: Simple catheter preparation for permitting bolus intrathecal administration during chronic intrathecal infusion. *Pharmacol Biochem Behav* 25:483-485, 1986
19. Segal IS, Vickery RG, Walton JK, Doze VA, Maze M: Dexmedetomidine diminishes halothane anesthetic requirements in rats through a postsynaptic alpha2 adrenergic receptors. *ANESTHESIOLOGY* 69:818-823, 1988
20. Hayashi Y, Guo T-Z, Maze M: Desensitization to the behavioral effects of  $\alpha_2$  adrenergic agonists in rats. *ANESTHESIOLOGY* 82:954-962, 1995
21. Hoshino S, Kikkawa S, Takahashi K, Itoh H, Kaziro Y, Kawasaki H, Suzuki K, Katada T, Ui M: Identification of sites for alkylation by N-ethylmaleimide and pertussis toxin catalyzed ADP-ribosylation on GTP-binding proteins. *FEBS Lett* 276:227-231, 1990
22. Eason MG, Kurose H, Holt BD, Raymond JR, Liggett SB: Simultaneous coupling of alpha 2-adrenergic receptors to two G-proteins with opposing effects. Subtype-selective coupling of alpha 2C10, alpha 2C4, and alpha 2C2 adrenergic receptors to Gi and Gs. *J Biol Chem* 267:15795-801, 1992
23. van der Ploeg I, Cintra A, Altiok N, Askelof P, Fuxe K, Fredholm BB: Limited distribution of pertussis toxin in rat brain after injection into the lateral cerebral ventricles. *Neuroscience* 44:205-214, 1991
24. Drasner K, Bernards CM, Ozanne GM: Intrathecal morphine reduces the minimum alveolar concentration of halothane in humans. *ANESTHESIOLOGY* 9:310-312, 1988
25. Omote K, Kitahata LM, Collins JG, Nakatani K, Nakagawa I: Interaction between opiate subtype and alpha-2 adrenergic agonists



in suppression of noxiously evoked activity of WDR neurons in the spinal dorsal horn. *ANESTHESIOLOGY*, 74:737-43, 1991

26. Reddy SVR, Yaksh TL: Spinal noradrenergic terminal system mediates antinociception. *Brain Res* 189:391-401, 1980

27. Reddy SVR, Maderdrut JL, Yaksh TL: Spinal cord pharmacology of adrenergic agonist-mediated antinociception. *J Pharmacol Exp Ther* 213:525-533, 1980

28. Puig MM, Turndorf H, Warner W: Synergistic interaction of morphine and halothane in the guinea pig ileum: Effects of pertussis toxin. *ANESTHESIOLOGY* 72:699-703, 1990

29. Puig MM, Turndorf H, Warner W: Effects of pertussis toxin on

the interaction of azeperole and halothane. *J Pharmacol Exp Ther* 252:1156-1159, 1990

30. Vulliemoz Y: The myocardial depressant effect of volatile anesthetics does not involve arachidonic acid metabolites or pertussis toxin-sensitive G-proteins. *Eur J Pharmacol* 203:345-351, 1991

31. Morimoto N, Yamaoto K, Jones KA, Warner DO: Halothane and pertussis toxin-sensitive G-proteins in airway smooth muscle. *Anesth Analg* 78:328-334, 1994

32. Rampil I: Anesthetic potency is not altered after hypothermic spinal cord transection in rats. *ANESTHESIOLOGY* 80:606-610, 1994

Anesthesiology  
83:823-834, 1995  
© 1995 American Society of Anesthesiologists  
Lippincott-Raven Publishers

# Halothane and derived Relax Guanosine M Endothelial C Independent Cyclase Activ

Roger A. Johns, M.D., \*Alexa  
Timothy D. Le Cras, Ph.D., ||

**Background:** Interaction of  
nitric oxide signaling pathw  
effects are controversial. The  
the sites and mechanism of in  
with the vascular nitric oxid  
pathway.

**Methods:** To specifically stud  
interaction with the nitric oxide-  
vascular smooth muscle and  
muscle (EC-VSM) co-culture m  
tures of VSM with or without  
on microcarrier beads were p  
stimulated with agonists. The  
on cyclic guanosine monoph  
ulated VSM and of VSM in w  
been activated by the endoth  
tors, sodium nitroprusside, ni  
terminated. Experiments were  
of inhalational anesthetics on

\* Professor of Anesthesiology

† Laboratory Specialist

‡ Medical Student

§ Resident in Anesthesiology

|| Postdoctoral Fellow in An

# Research Assistant Profess

Received from the Departm

Virginia Health Sciences Cent

for publication December 12,

12, 1995. Supported by Natio

HL39706, RO1-GM49111, and

part at the meeting of the Socie

Montreal, Canada, April 1994.

Address reprint requests to Dr

University of Virginia Health S

ville, Virginia 22908. Add

virginia.edu.

Anesthesiology, V 83, No 4, O
